# Supplementary material
Source: HighWire-hosted journal article supplement (https://bmjopen.bmj.com/content/6/4/e010569)
Supplement: inline-supplementary-material-1 [file inline-supplementary-material-1.pdf]

**Author(s):** Elie A Akl, Lara Kahale, Rami A Ballout, Maddalena Barba, Victor E D Yosucio, Frederiek F van Doormaal, Saskia Kuipers, Saskia Middeldorp, Heather O Dickinson, Andrew Bryant, Holger Schünemann

**Date:**

**Question:** Heparin compared to placebo for ambulatory patients with cancer who have no therapeutic or prophylactic indication for anticoagulation

**Setting:**

**Bibliography:** Akl EA, Kahale L, Ballout RA, Barba M, Yosucio VE D, van Doormaal FF, Kuipers S, Middeldorp S, Dickinson HO, Bryant A, Schünemann H. Parenteral anticoagulation in ambulatory patients with cancer who have no therapeutic or prophylactic indication for anticoagulation. Cochrane Database of Systematic Reviews [Year], Issue [Issue].

| Quality assessment     |                   |              |                          |              |                      |                      | No of patients    |                   | Effect                 |                                              | Quality          | Importance |
|------------------------|-------------------|--------------|--------------------------|--------------|----------------------|----------------------|-------------------|-------------------|------------------------|----------------------------------------------|------------------|------------|
| No of studies          | Study design      | Risk of bias | Inconsistency            | Indirectness | Imprecision          | Other considerations | Heparin           | placebo           | Relative (95% CI)      | Absolute (95% CI)                            |                  |            |
| Mortality at 12 months |                   |              |                          |              |                      |                      |                   |                   |                        |                                              |                  |            |
| 13                     | randomised trials | not serious  | not serious              | not serious  | serious <sup>1</sup> | none                 | 1683/3667 (45.9%) | 1580/3346 (47.2%) | RR 0.97 (0.92 to 1.01) | 14 fewer per 1000 (from 5 more to 38 fewer)  | ⊕⊕⊕○<br>MODERATE |            |
| Mortality at 24 months |                   |              |                          |              |                      |                      |                   |                   |                        |                                              |                  |            |
| 7                      | randomised trials | not serious  | not serious              | not serious  | serious <sup>1</sup> | none                 | 608/791 (76.9%)   | 677/830 (81.6%)   | RR 0.95 (0.90 to 1.00) | 41 fewer per 1000 (from 0 fewer to 82 fewer) | ⊕⊕⊕○<br>MODERATE |            |
| Symptomatic DVT        |                   |              |                          |              |                      |                      |                   |                   |                        |                                              |                  |            |
| 9                      | randomised trials | not serious  | not serious <sup>2</sup> | not serious  | not serious          | none                 | 50/3277 (1.5%)    | 100/2932 (3.4%)   | RR 0.49 (0.28 to 0.86) | 17 fewer per 1000 (from 5 fewer to 25 fewer) | ⊕⊕⊕⊕<br>HIGH     |            |
| Symptomatic PE         |                   |              |                          |              |                      |                      |                   |                   |                        |                                              |                  |            |
| 9                      | randomised trials | not serious  | not serious              | not serious  | serious <sup>3</sup> | none                 | 29/3294 (0.9%)    | 46/2951 (1.6%)    | RR 0.59 (0.37 to 0.96) | 6 fewer per 1000 (from 1 fewer to 10 fewer)  | ⊕⊕⊕○<br>MODERATE |            |
| Major bleeding         |                   |              |                          |              |                      |                      |                   |                   |                        |                                              |                  |            |
| 15                     | randomised trials | not serious  | not serious              | not serious  | serious <sup>4</sup> | none                 | 72/3847 (1.9%)    | 66/3516 (1.9%)    | RR 1.14 (0.70 to 1.85) | 3 more per 1000 (from 6 fewer to 16 more)    | ⊕⊕⊕○<br>MODERATE |            |
| Minor bleeding         |                   |              |                          |              |                      |                      |                   |                   |                        |                                              |                  |            |
| 13                     | randomised trials | not serious  | not serious              | not serious  | serious <sup>3</sup> | none                 | 164/3595 (4.6%)   | 99/3289 (3.0%)    | RR 1.32 (1.02 to 1.71) | 10 more per 1000 (from 1 more to 21 more)    | ⊕⊕⊕○<br>MODERATE |            |

CI: Confidence interval; RR: Risk ratio; HR: Hazard Ratio

1. Confidence interval includes values suggesting clinically significant benefit and values suggesting no effect
2. I<sup>2</sup>=50%
3. Confidence interval includes values suggesting clinically significant harm and values suggesting no effect
4. Confidence interval includes values suggesting clinically significant benefit and values suggesting harm
